# Supplementary material
Source: Springer Nature journal article supplement (http://www.springermedizin.de/resource/supplementary/13052_2009_37_MOESM4_ESM.pdf/9671262)

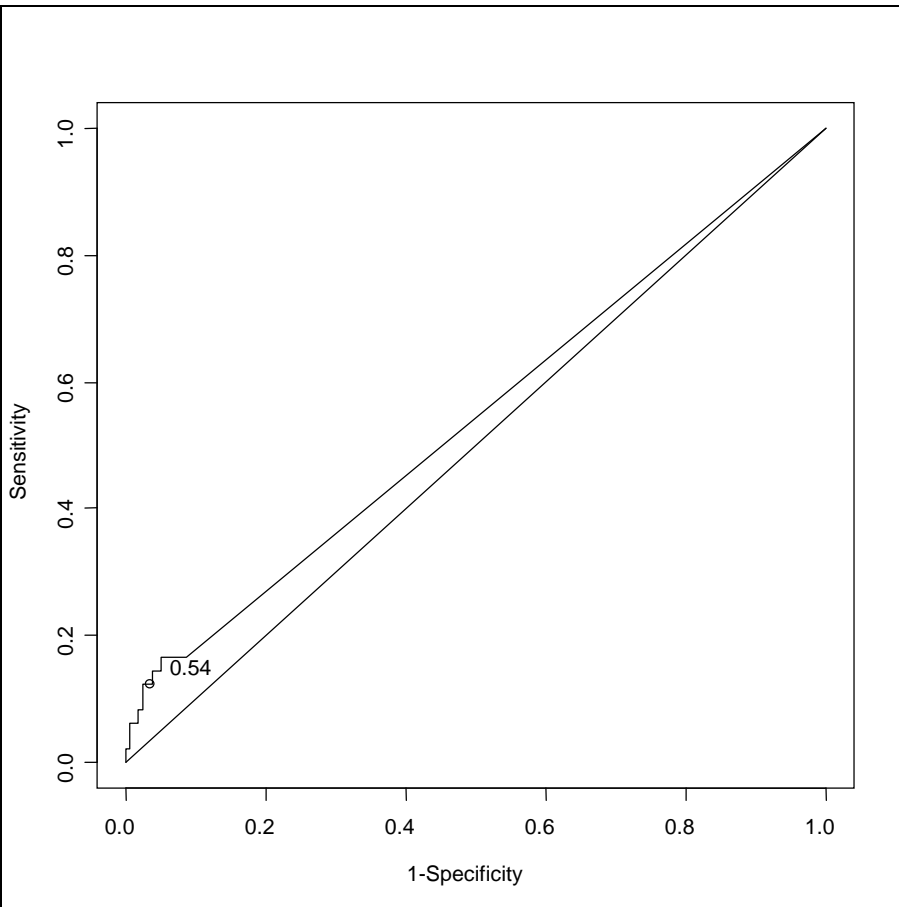

Supplement: MOESM4 [file 9671262]
